1 **Title:**

2 **Impression cytology is a non-invasive and effective method for ocular cell**  
3 **obtention from babies with Congenital Zika Syndrome: perspectives in**  
4 **OMIC studies.**

5

6 **Alternative title:**

7 **Ocular impression cytology enables morphological, molecular and OMIC**  
8 **studies of babies with Congenital Zika Syndrome**

9

10 **Authors:**

11 Raquel Hora Barbosa, PhD<sup>1,2\*</sup>, Maria Luiza B. dos Santos, MD<sup>2</sup>, Thiago P.  
12 Silva, PhD<sup>3</sup>, Liva Rosa-Fernandes, PhD<sup>4</sup> Ana Pinto, PhD<sup>5</sup>, Pricila S. Spínola,  
13 MsC<sup>6</sup>, Cibele R. Bonvicino, PhD<sup>6</sup>, Priscila V. Fernandes, MsC<sup>7</sup>, Evandro  
14 Lucena, MD<sup>8</sup>, Giuseppe Palmisano, PhD<sup>4</sup>, Rossana C. N. Melo, PhD<sup>3</sup>, Claudete  
15 Cardoso, MD, PhD<sup>2</sup>, Bernardo Lemos, PhD<sup>1</sup>.

16 **\*Corresponding Author:**

17 Raquel Hora Barbosa, PhD, [barbosa.raquelh@gmail.com](mailto:barbosa.raquelh@gmail.com).

18 Address 1: Maternal and Child Department, Faculty of Medicine, Universidade  
19 Federal Fluminense, Rua Marques do Paraná, 303, Niteroi, Rio de Janeiro,  
20 Brazil - 24033 900, Phone: + 55 21 2629-9255.

21 Address 2: Molecular and Integrative Physiological Sciences Program,  
22 Department of Environmental Health, Harvard School of Public Health, 665  
23 Huntington Avenue, Boston, MA, USA - 02115,  
24 Phone: 617-432-1193 | Fax: 617-432-3468.

25 **Affiliations:**

26 1- Molecular and Integrative Physiological Sciences Program, Department  
27 of Environmental Health, Harvard School of Public Health, Boston,  
28 Massachusetts, U.S.

29 2- Maternal and Child Department, Faculty of Medicine, Universidade  
30 Federal Fluminense, Niteroi, Rio de Janeiro, Brazil.

31 3- Laboratory of Cellular Biology, Department of Biology, Universidade  
32 Federal de Juiz de Fora, MG, Brazil

33 4- Glycoproteomics Laboratory, Department of Parasitology, ICB,  
34 Universidade de São Paulo, Brazil

35 5- Biomedical Institute, Universidade Federal Fluminense, Niteroi, Rio de  
36 Janeiro, Brazil.

37 6- Genetic Program, Instituto Nacional de Câncer, Rio de Janeiro, Brazil.

38 7- Pathology Division, DIPAT, Instituto Nacional de Câncer, Rio de Janeiro,  
39 Brazil.

40 8- Clinical Research Division, Instituto Nacional de Câncer, Rio de Janeiro,  
41 Brazil.

42

43

44

45

46 **Key words: Congenital Zika Syndrome, Zika virus, impression cytology,**  
47 **ocular cells, ophthalmic pathologies, neurodevelopmental disorders,**  
48 **molecular research, cell imaging, OMIC studies.**

49 **Key points**

50 **Question:** Are the ocular surface cells of babies with Congenital Zika  
51 Syndrome viable to investigate the association between Zika virus infection  
52 during embryogenesis and ocular impairment?

53 **Findings:** To this date, this is the first study using an approach with  
54 perspectives in morphological, molecular and "OMICs" research from ocular  
55 samples captured by impression cytology of ZIKV infected babies during  
56 embryogenesis. The microscopic features of the conjunctival epithelial cells  
57 from all ZIKV infected babies showed clear morphological alterations.

### 58 **Meaning**

59 Ocular cell surface capture offers a powerful model for studying the pathways  
60 involved in ocular diseases associated with ZIKV.

61

62

63

64

65

66

67

68

69

70

71

72

73

74

75 **Abstract**

76 **IMPORTANCE:** Noninvasive techniques for obtaining ocular surface cells  
77 (neuroepithelial) from babies with Congenital Zika Syndrome CZS - resulting  
78 from infection by zika virus (ZIKV) during gestational period (malformations  
79 include ocular abnormalities and microcephaly) - remain to be determined.

80 **OBJECTIVES:** The aim of this study was to describe an optimized impression  
81 cytology method for the isolation of viable cells from babies with CZS in  
82 satisfactory amounts and quality to enable the application in the context of  
83 genome approaches well as morphological and molecular evaluations.

84 **DESIGN, SETTINGS AND PARTICIPANTS:** In this observational study, ocular  
85 surface samples were obtained with a hydrophilic nitrocellulose membrane  
86 (through optimized impression cytology method) from twelve babies referred to  
87 the Pediatric Service of the Antonio Pedro Hospital, Universidade Federal  
88 Fluminense (UFF), Niteroi, Rio de Janeiro, Brazil. Samples were collected with  
89 an authorized informed consent from both eyes of eight ZIKV infected babies  
90 according to the CZS diagnostic criteria (4 babies with positive PCR for Zika  
91 virus in gestation and presence of clinical signs which included ocular  
92 abnormalities and microcephaly and 4 babies with positive PCR for Zika virus  
93 during gestation but no clinical signs identified) and four unaffected babies  
94 (control samples / negative PCR, without clinical signs). Cells were used for  
95 microscopy analyses, transcriptomic and proteomic experiments and molecular  
96 procedure.

97 **MAIN OUTCOMES AND MEASURES:** The microscopic features of the  
98 conjunctival epithelial cells were described by both direct analysis of the  
99 membrane-attached cells and analysis of cytopinned captured cells using

100 several staining procedures, including viability evaluation. In parallel, molecular  
101 approaches were performed.

102 **RESULTS:** On impression cytology, a considerable amount of viable cells were  
103 captured. Epithelial basal, polyhedral and goblet cells were clearly identified in  
104 all groups. All cases of ZIKV infected babies showed clear morphological  
105 alterations (cell keratinization, piknosis, karyolysis, anucleation and  
106 vacuolization). Genomic DNA and RNA were successfully isolated from all  
107 samples and allowed the establishment of transcriptomic and proteomic studies.  
108 Transcriptome analysis showed 8582 transcripts quantified in all samples and  
109 63 differentially expressed genes in ocular cells from the exposed babies.  
110 Proteomics analysis allowed the identification of 2080, 2085 and 2086 high  
111 confident and unique proteins with at least one unique peptide in the unaffected,  
112 exposed to ZIKV and asymptomatic and CZS babies, respectively, being 2062  
113 in common. Multivariate supervised analysis using the total quantitative protein  
114 features revealed a clear discrimination between the groups.

115 **CONCLUSIONS AND RELEVANCE:** Our method proved to be a suitable, fast,  
116 and non-invasive tool for detailed and precise morphological analyses with a  
117 perspective of application in OMIC studies for clinical and research studies of  
118 CZS.

119

120

121

122

123

124

## 125 **Introduction**

126           Zika virus (ZIKV) is an arbovirus of the Flavivirus genus first identified  
127 in Uganda - Zika forest, in 1947<sup>1</sup>. In 2015, after an outbreak of acute  
128 exanthematic disease, ZIKV was detected in Northeast Region of Brazil<sup>2,3</sup>.  
129 However, recent studies indicate that the virus circulation in Brazil occurred  
130 prior to this epidemic period<sup>4, 5, 6, 7</sup>.

131           Congenital Zika Syndrome (CZS) was identified due to the increased  
132 incidence of congenital defects associated with ZIKV infection. This led to  
133 clinical, epidemiological and experimental studies seeking to address the  
134 association between congenital defects and ZIKV infection. Furthermore, the  
135 World Health Organization (WHO) recognized ZIKV and associated  
136 neurological complications as a long-term public health challenge. A global  
137 strategic response plan has been issued to enable detection, prevention, care  
138 and support in affected areas<sup>8</sup>. Studies were also launched to advance the  
139 development of intervention, control and prevention strategies<sup>9</sup>.

140           Studies on CZS have predominantly involved analysis of brain  
141 regions<sup>10, 11, 12, 13</sup> but studies of the ocular system have also been conducted.  
142 The studies documented characteristic ocular lesions, such as pigment mottling,  
143 macular atrophy, chorioretinal atrophy, horizontal nystagmus and optic nerve  
144 hypoplasia and atrophy in the context of ZIKV infection<sup>14, 15, 16, 17, 18, 19</sup>. Retinal  
145 changes occur in about 30 to 40% of cases and anomalies of the development  
146 of the eye may occur in several embryogenesis stages such coloboma and  
147 ocular structure, including eyelid, cornea, iris, zonula and ciliary body, choroid,  
148 retina and optic nerve<sup>20, 21</sup>. Consequently, screening and long-term monitoring

149 of ocular health are crucial to all children with possible congenital ZIKV infection  
150 <sup>22,23</sup>.

151 Molecular methodologies were established to investigate the association  
152 between ZIKV and neurological impairment using induced pluripotent stem cells  
153 and embryonic stem cell lines differentiated in neuroprogenitors, neurons, glial  
154 cells and into brain organoid structures<sup>24</sup>. However, the use of non-invasive  
155 strategies to study ocular cells in ZIKV-infected babies remain to be determined.

156 Impression cytology of ocular cells is a noninvasive method for external  
157 evaluation of ocular lesions<sup>25</sup>. This technique has been developed since the  
158 discovery that cells from the eye outside of the epithelial layer could be  
159 removed by filter membrane application to evaluate various conditions of ocular  
160 surface impairment<sup>26</sup>. This method has been applied to anatomically locate the  
161 conjunctiva, quantify goblet cell density, stage squamous metaplasia staging,  
162 differentiate bacterial, viral, allergic, degenerative or tumor affections<sup>27,28,29,30,</sup>  
163 <sup>31,32</sup>.

164 The aim of this study was to develop ocular impression cytology for the  
165 isolation of viable cells in satisfactory amounts and quality to enable the  
166 application in the context of genome approaches. OMIC technologies are high-  
167 throughput methodologies that have not been coupled with ocular analysis in  
168 CZS until this moment. These technologies encompass genomics,  
169 transcriptomics, epigenomics, proteomics, and metabolomics, and can provide  
170 a global representation of the processes within cells at several levels,  
171 contributing to advances in biology and medicine<sup>33</sup>. Here we propose an  
172 optimized and noninvasive alternative for obtaining ocular cells from babies with  
173 ocular anomalies caused by ZIKV infection during embryogenesis, and its

174 coupling with OMIC applications. Considering that conjunctival cells arise from  
175 neurogenic ectoderm<sup>34</sup> and the well-documented ZIKV neurotropism with  
176 affinity for neural progenitor cells<sup>35, 36, 37, 10, 38, 35</sup>, the methodology presented  
177 here may be used to obtain ocular/neuroepithelial cells as potential models of  
178 neural cells for CZS research.

179

## 180 **Material and Methods**

### 181 Study design and ethic aspects

182 Twelve babies referred to the Pediatric Service of the Antonio Pedro  
183 Hospital, Universidade Federal Fluminense (UFF) were included in this study.  
184 All children have been followed by periodical ophthalmological examinations;  
185 samples were obtained with an authorized informed consent. This study was  
186 approved by Universidade Federal Fluminense Ethics Committee and followed  
187 the tenets and guidelines of the Declaration of Helsinki.

188 Ocular surface samples were collected from both eyes of eight babies  
189 according to the CZS diagnostic criteria (Group A: Patients 1 to 4 = positive  
190 PCR for Zika virus in gestation and presence of clinical signs which included  
191 ocular abnormalities and microcephaly (ZIKV/CZS); Group B: Patients 5 to 8 =  
192 positive PCR for Zika virus during gestation but no clinical signs identified;  
193 ZIKV) and four unaffected babies (Group C; control samples: Patients 9 to 12 =  
194 negative PCR, without clinical signs; CTRL).

195

### 196 *Impression cytology and ocular surface cells capture*

197 A local anesthetic (Proxymetacaine hydrochloride, 0.5% w/v, eye drops,  
198 solution.) was instilled into the eye before obtaining the ocular surface samples.



199 The samples were collected with a sterilized 0.45 $\mu$ m, 47mm white plain  
200 hydrophilic nitrocellulose membrane (Millipore Sigma®, catalogue number  
201 HAWP047S0). Each circular membrane was cut into four strips measuring  
202 0.75cm wide and 4.5 long approximately (Figure 1).

203 The method here described does not use tweezers or pediatric lid  
204 speculum for sample collection. A stem of the membrane is used as a collection  
205 support. The strip ends were rounded and bent at approximately 1cm to  
206 facilitate printing on the ocular surface and comprises the capture area of ocular  
207 cells (Figure 1). The strip end was then pressed on to the inferior bulbar  
208 conjunctiva for approximately five seconds. The strip stem was discarded after  
209 the collection by using a sterilized scissors (Figure 1).

210

#### 211 *Cell collection and storage*

212 The cell capture area of the filter membrane was immediately placed in a  
213 1.5 mL tube on ice containing 250  $\mu$ L 1X PBS (Phosphate Buffered Saline,  
214 pH7.4 - ThermoFisher Scientific, catalog number: 10010023). Tubes containing  
215 filter membranes were rapidly vortexed to allow release of adhered cells (Figure  
216 1). Cell suspensions were then used for microscopy analyses or aliquoted in 0.2  
217 mL tubes and stored for additional experiments. Specifically, we aliquoted 9  $\mu$ L  
218 for Transcriptomic experiments - Single Cell RNAseq (stored at - 80°C); 100  $\mu$ L  
219 for Proteomic experiments (stored at - 80°C) and 100  $\mu$ L for DNA isolation  
220 (stored at 4°C).

221

#### 222 *Cell analysis and Microscope Image Acquisition*

#### 223 *Cell Viability*

224 Viability of the collected cells was determined by the trypan blue  
225 exclusion test [9 $\mu$ L of the suspension cells plus 1 $\mu$ L of 0.4% trypan blue solution  
226 (TermoFisher Scientific, catalog number: 15250061)]. Viable cells were  
227 counted in a Neubauer chamber. Images were acquired using on Axio  
228 microscope with 20x/0.35 and 40x/0.55 Zeiss A-Plan objectives (Carl Zeiss,  
229 Jena, Germany, <http://www.zeiss.com>) and Q-Capture PRO 7 software (Surrey,  
230 BC, Canada, [www.qimaging.com](http://www.qimaging.com)).

231 Additionally, cytospin procedure was used for allows the concentration of  
232 single cells in suspension on a microscope slide. Cytocentrifuged preparations  
233 (200  $\mu$ L of cell suspension/slide) were obtained in a Cytospin 4 Shandon  
234 (Thermo Scientific Corporation, Waltham, MA) at 800 rpm for 5 minutes at room  
235 temperature and stained with LIVE/DEAD<sup>TM</sup> viability/cytotoxicity kit  
236 (ThermoFisher Scientific, catalog number L3224) as the manufacturer's  
237 instructions. This kit contains a mixture of fluorescent stains (calcein-AM and  
238 ethidium homodimer-1) which discriminates live from dead cells by  
239 simultaneously staining with green-fluorescent calcein-AM to indicate  
240 intracellular esterase activity and red-fluorescent ethidium homodimer-1 to  
241 indicate loss of plasma membrane integrity. Analyses were performed on a  
242 fluorescence microscope (BX-60, Olympus, Melville, NY, USA) using U-MWB  
243 FITC/Texas red filter (488–570 nm excitation wavelengths), which allows  
244 simultaneous visualization of both markers.

245

#### 246 *Cell Morphology*

247 To evaluate microscopic features of the captured cells such as  
248 morphological types and possible alterations we then used another collection

249 membrane directly stained with hematoxylin and eosin after fixation for 10 min  
250 in a fixation solution (100 mL of 70% ethanol, 5 mL of glacial acetic acid and 5  
251 mL of 37% formaldehyde solution – all solutions are from Merck Millipore).  
252 Samples were hydrated with distilled water for 5 minutes, immersed in Harris'  
253 hematoxylin for 2 minutes, washed with tap water for 15 minutes,  
254 counterstained with eosin for 30 seconds, washed with tap water for 5 minutes,  
255 and then dehydrated in 70%, 80%, 95%, and 100% ethyl alcohol (rapid  
256 immersion for 5 seconds each). After these steps, samples were immersed in  
257 xylene (ten successive immersions for 5 minutes each) and mounted on slides  
258 cover-slipped using Entellan mounting medium (Merck, Millipore). Images were  
259 acquired using on Axio microscope with 20x/0.35 and 40x/0.55 Zeiss A-Plan  
260 objectives (Carl Zeiss, Jena, Germany, <http://www.zeiss.com>) and Q-Capture  
261 PRO 7 software (Surrey, BC, Canada, [www.qimaging.com](http://www.qimaging.com)).

262 Another cytocentrifuged preparation was also stained for morphological  
263 analyses. For this, cell suspensions obtained as above were fixed in 4%  
264 paraformaldehyde and cytocentrifuged (Cytospin 4 Shandon, Thermo Scientific,  
265 1200 rpm, 10 minutes). Slides of captured cells (n=3 patients for each group)  
266 were prepared in quadruplicate. For each pair of slides, one was stained with a  
267 Diff-Quik kit, as the standard procedure, and the other one with 0.5% toluidine  
268 blue O solution (Fisher Scientific) for 5 minutes. Cells were analyzed on a BX-  
269 60 Olympus microscope,

270

### 271 *Molecular analyses*

272 To evaluate the integrity and quality of the genomic material of  
273 captured ocular surface cells, DNA was isolated according to QIAamp DNA mini

274 kit (Qiagen, Valencia, CA), which is indicated for swabs, body fluids or washed  
275 cells. Thereafter, we used a pair of primers to amplify a region (exon 4) of the  
276 *MCPE2* gene that possess a significant role in embryonic development. The  
277 forward: U-GGA AAG GAC TGA AGA CCT GTA AG and Reverse R-CTC CCT  
278 CCC CTC GGT GTT TG (fragment size = 372pb) primers were used and PCR  
279 conditions with modifications were applied according to previous report<sup>39</sup>. The  
280 PCR was performed in a total volume of 25 $\mu$ L, including 1 $\mu$ L DNA template, 1 $\mu$ L  
281 of each primer (10  $\mu$ M), 13.8 $\mu$ L distilled ddH<sub>2</sub>O, 5.0 $\mu$ L buffer, 2.5  $\mu$ L MgCl<sub>2</sub>, 0.5  
282  $\mu$ L dideoxynucleotide and 0.2 $\mu$ L of the Platinum Taq DNA polymerase  
283 (Platinum<sup>TM</sup> Taq DNA polymerase, Catalog number: 10966026; Thermo Fisher  
284 Scientific). Touchdown program was used in the Veriti 96 Applied Biosystems  
285 PCR thermal cycler and all samples were denatured at 95°C for 2min and  
286 30sec, followed by: 25 cycles of 94°C for 30sec, 65°C for 30sec, and 72°C for  
287 1min45sec, followed by 10 cycles of 94°C for 30sec, 51°C for 30sec and and  
288 72°C for 1min30sec then a final extension 72°C for 5min. For each sample, 5 $\mu$ L  
289 of the final PCR product was checked by 1% agarose gel electrophoresis.

290 For transcriptomic experiments 9 $\mu$ L of suspension solution (after fast  
291 vortex of capture membrane – Figure 1) containing a maximum number of 150  
292 cells were processed through the Single Cell RNASeq Service (SingulOmics<sup>40</sup>/  
293 Novogene<sup>41</sup>) which included cDNA synthesis and amplification, library  
294 preparation, sequencing (10 million paired-end reads) and data analysis.

295 Here, total RNA quality assessment in the samples including preparation  
296 of the Single Cell RNA library was performed by SingulOmics<sup>40</sup> using the 2100  
297 Bioanalyzer<sup>42</sup> - a microfluidic platform for the electrophoretic separation of

298 biomolecules - extremely useful for identifying contaminated and degraded RNA  
299 (Figure 4).

300 For proteomics experiments proteins were extracted from the membrane,  
301 digested with trypsin and analysed in a data-dependent manner by nanoflow  
302 liquid chromatography coupled to high accuracy and resolution mass  
303 spectrometry, Orbitrap Fusion tribrid, Thermo Fisher. Raw data were searched  
304 using Sequest database search engine using reviewed Uniprot human protein  
305 database. Protein identifications were filtered with less than 1% FDR.

306

## 307 **Results**

### 308 *Clinical aspects*

309 Samples were collected from both eyes of eight boys and four girls'  
310 babies with 21 months median age (Table 1). ZIKV infected babies according to  
311 the CZS diagnostic criteria (4 babies with positive PCR for Zika virus in  
312 gestation and presence of clinical signs which included ocular abnormalities and  
313 microcephaly – ZIKV infection predominantly in the first trimester), 4 babies with  
314 positive PCR for Zika virus during gestation (occurring in the second and third  
315 trimester) but no clinical signs identified and 4 unaffected babies (control  
316 samples / negative PCR, without clinical signs).

317

### 318 *Cell visualization, counting, distribution and morphological aspects*

319 Here we developed a membrane model for cell collection with a  
320 rounded apex and a long base of support that provided a correct positioning for  
321 the capture time and for fixing and staining. We used the membrane extremity

322 as collection support and then discarded not requiring the use of tweezers and  
323 pediatric lid speculum (Figure 1).

324 The impression cytology with nitrocellulose membrane model we  
325 developed here is effective for ocular surface cells capture. We observed the  
326 presence of cells in all collection membranes. In only 9 $\mu$ L of cell suspension  
327 after fast vortex (from an initial total of 250  $\mu$ L), the number of cells retrieved  
328 ranged from 15 to ~150 cells. Most cells remained attached to the membrane.

329 Cell viability evaluations by trypan blue test of captured cell  
330 suspensions showed that most cells (> 95%) were viable immediately after  
331 collection in all groups and different epithelial and goblet cells were observed in  
332 Neubauer *chamber*. In addition, live cells were imaged by intense, uniform  
333 green fluorescence (Figure 2A) while dead cells fluoresced orange-red after  
334 staining with a live/dead viability kit (Supplementary Figure 1). We detected the  
335 presence of viable cells adhered to the collection membrane (attached to the  
336 nitrocellulose fibers) 5h after application of impression cytology (Figure 2).

337 Microscopic analysis of the stained membranes (Figure 2B), showed  
338 presence of varying amounts of cells in all of them. Individuals infected with  
339 ZIKV (Figure 2B1 and B2) showed apparently more cells attached to the  
340 membrane when compared with control subjects (Figure 2B3 and B4). Some  
341 impression areas stained more intensely likely due to multilayering of the cells.  
342 The morphologic evaluation was impaired in these regions. Of note, we  
343 observed that the eyes with excessive tearing had worse results in the capture  
344 of cells; however, this did not affect both the collection and additional  
345 procedures.

346 Morphological cell analyses were performed after citospinning the cell  
347 suspensions which facilitated adhesion of the cells on the slides and resulted in  
348 enhanced visualization of cell features (Figure 3). The following cell types,  
349 characteristic of the conjunctiva, were identified in all groups: epithelial basal  
350 cells, epithelial polyhedral cells and goblet cells (Figure 3A). Epithelial cells of  
351 the basal layer were seen individually or in small clusters, with a round to oval  
352 shape and a central nucleus and scant cytoplasm (Figure 3A2 and A3). Basal  
353 cells stained more strongly compared to other epithelial cells. Intermediate and  
354 more superficial epithelial cells were recognized by their polyhedral and  
355 abundant cytoplasm with a small and central nucleus (Figure 3A4 and A5).  
356 Goblet cells were identified by their typical morphology – an eccentric nucleus  
357 and a pale cytoplasm in their apical region (Figure 3A6 and A7). When the  
358 groups were compared, morphological changes were clearly detected in cells  
359 collected from ZIKV infected patients, predominantly in those with clinical signs  
360 (CZS), compared to uninfected controls. These included nuclear and  
361 cytoplasmic alterations such as mild to moderate keratinization (Figure 3B1-B4),  
362 piknosis (Figure 3B4 and B5), karyolysis (Figure 3B2 and B3), anucleation  
363 (Figure 3B6) and cytoplasmic vacuolization (Figure 3B7 and B8).

364

#### 365 *Molecular applications and genomic analyses*

366 Genomic DNA was successfully isolated from all samples. The amount  
367 of genomic DNA ranged from 10ng/ $\mu$ L to as much as 70ng/ $\mu$ L, with good  
368 integrity, and sufficient for successful PCR reactions. A unique fragment of  
369 372bp correspondent to partial region of exon 4 of the *MCPE2* gene was  
370 detected in all samples (Figure 4). We also obtained whole and viable cells in

371 good quality for downstream applications using transcriptomic, epigenetic, or  
372 proteomic approaches (Figure 4 and unpublished data). As an example, RNA  
373 preparations were obtained and proceed with RNA-seq. Given the small  
374 number of cells in some preps, we conducted whole transcriptome PCR  
375 amplification prior to sequencing. Sufficient RNA and transcriptome libraries  
376 were obtained for all samples. Transcriptome analysis showed 8582 transcripts  
377 quantified in all samples (5 reads or more). Relative to the unaffected group  
378 (CTRL) group, we observed 63 differentially expressed genes ( $p$ value<0.001)  
379 when ocular cells from the exposed babies (ZIKV/CZS and ZIKV; Figure 5 and  
380 unpublished data).

381 Large scale quantitative mass spectrometry-based proteomics analysis  
382 allowed the identification of 2080, 2085 and 2086 high confident and unique  
383 proteins with at least one unique peptide in the CTRL, ZIKV and ZIKV/CZS  
384 conditions, respectively, being 2062 in common; Table 2 and unpublished data).  
385 Multivariate supervised analysis using the total quantitative protein features  
386 revealed a clear discrimination between the CTRL and ZIKV/CZS groups.

387

## 388 **Discussion**

389 Impression cytology has been shown to be a simple and reproducible  
390 technique that can be successfully performed in preterm or term infants<sup>43</sup>.  
391 However, some authors have reported difficulties in obtaining adequate  
392 samples of infants<sup>44,45</sup>. The methods previously described mostly used tweezers  
393 and/ or pediatric lid speculum for collection of samples. Here we optimize the  
394 technique and discard the use of invasive apparatus, enabling a safer and more  
395 effective method for the collection of baby ocular samples. The protocols can be



396 straightforwardly performed with sufficient training and easily scaled for  
397 analyses of larger clinical populations and under a variety clinical context.

398

399 *Ocular surface cells: perspective applications in CZS studies*

400         Approximately 50% of children born with CZS and microcephaly  
401 present serious eye diseases<sup>46</sup>. Furthermore, the ZIKV has the potential to  
402 survive for long periods in ocular tissue and potentially cause outcomes that will  
403 only be manifested later in life<sup>47</sup>. The human ocular surface, a specialized  
404 region derived from neurogenic ectoderm which includes the corneal, limbal,  
405 and conjunctival stratified epithelia, play an essential role in ocular system<sup>48</sup>.  
406 Due to zika virus neurotropism for infect neural cells in human embryonic  
407 development, the ocular cells obtained in this study may represent an adequate  
408 model for analysis of molecular alterations resulting from ZIKV virus and  
409 neuronal cells interaction. Moreover, since viral ZIKV RNA may be present in  
410 ocular fluids (in tears and lacrimal glands)<sup>49, 50, 51</sup>, in our study we provide a  
411 methodology for cell capture with different perspectives of application. For  
412 example, the technique is applicable to the immunolocalization of a wide range  
413 of proteins, including detection of ZIKV antigens; to viral analysis through Real  
414 Time PCR and ultrastructural microscopy. Studies of the cellular anatomy,  
415 physiology and molecular aspects of the ocular surface are essential for  
416 understanding ZIKV-associated ocular and neurologic disorders.

417         Since ZIKV infection has been related with central nervous system  
418 abnormalities, the investigation of alterations in genes associated with  
419 syndromes microcephaly and other syndromes is crucial. The *MECP2* gene,  
420 for instance, has been linked to Rett syndrome and Angelman syndrome, X-

421 linked mental retardation, neonatal encephalopathy (severe brain dysfunction in  
422 males who live only into early childhood), some cases of autism and systemic  
423 lupus erythematosus<sup>52</sup>. Here, with neuroepithelial cells, obtained non-invasively,  
424 we have successfully standardized a molecular study protocol for the *MCPE2*  
425 gene and can be optimized for several other molecular studies involving other  
426 genes of interest investigating the ZIKV and microcephaly association.

427           Molecular and cellular events, fundamental to embryological  
428 development, postnatal maturation, and maintenance of the ocular surface, are  
429 specifically regulated through advanced gene expression mechanisms. Several  
430 studies suggest a significant discrepancy between transcription and protein  
431 levels in specific cells, indicating that mechanisms related to regulation of  
432 alternative splicing, transcript stability, translation efficiency, protein stability  
433 also participate intrinsically in gene expression<sup>53,54</sup>. With the introduction of  
434 transcriptomic and proteomics tools we can compare the findings between the  
435 corresponding transcript and protein levels. In this study, we showed cells to be  
436 viable both for transcriptomic research via RNAseq technology and for  
437 proteomic validation. The quality of the RNA and libraries obtained in the study  
438 of transcriptome profiles is crucial for generating accurate and informative  
439 results. Transcriptome and proteomic profiling revealed differences between  
440 exposed and controls babies. However, this work focuses objectively on the  
441 detailed report of the methods performed to obtain viable cells from infants  
442 exposed and not exposed to zika virus with appropriate conditions for the  
443 establishment of molecular and OMICs procedures. The large-scale data  
444 generated from the different high throughput analyses (transcriptomics and  
445 proteomics) are detailed in complementary and separate works. Thus, the

446 analysis of differentially expressed genes identified and CZS associated are  
447 described in the Barbosa *et al.*, 2019 manuscript (submitted) and proteomic  
448 data are described in the Rosa-Fernades and Barbosa *et al.*, 2019 manuscript  
449 (submitted).

450 Despite their importance, many questions about the genetic  
451 characteristics of the conjunctival cells, mainly goblet cells are understudied and  
452 deserve further exploration<sup>55</sup>. Moreover, the molecular and morphological  
453 aspects of human conjunctival stem cells also have not been clearly  
454 elucidated<sup>41</sup>.

455 The strategies here used enabled clear detection of morphological  
456 changes in cells from ZIKV-infected patients such as cytoplasmic keratinization  
457 and nuclear alterations as observed in other ocular disorders using cytology  
458 impression approach<sup>56</sup>. To this date, this is the first study using an approach  
459 with perspectives in morphological, molecular and "OMICs" research from  
460 ocular samples captured by impression cytology of babies with CZS. Studies of  
461 mechanisms involved in CZS in ocular cells require rapid, highly reproducible,  
462 and accurate quantification and can be successfully achieved with impression  
463 cytology. Ocular cell surface capture offers a powerful model for studying the  
464 pathways involved in ocular diseases associated with ZIKV.

465

## 466 **Conclusion**

467 The impression cytology with nitrocellulose membrane model developed  
468 in this study is safe and effective method for babies ocular surface cells  
469 collection and can be applied to morphological, molecular and "OMIC" research  
470 in CZS studies.

471

472 **Acknowledgements**

473 We thank to the Zika Study Group of the Clinical Research Unit from  
474 the Universidade Federal Fluminense especially to the patients and their  
475 families and to Mrs. Angela Brum for the local assistance. We thank to Dr.  
476 Hector Seuanez and Dr. Miguel Moreira, researches from the INCA - Genetic  
477 Program, for the laboratorial facilities, discussion and for helpful suggestions.  
478 We also thank to MD. Fernando Agarez for help us with pathological reports  
479 and to Mr. Carlos Silva for the logistical support to the study.

480

481 **Author contributions:**

482 **Concept and design:** RHB, EL, CC

483 **Acquisition, analysis, or interpretation of data:** RHB, MLBS, TPS, LRF, AP,  
484 PSS, CRB, EL, GP, RCNM, CC, BL.

485 **Drafting of the manuscript:** RHB, RCNM, CC, BL.

486 **Critical revision of the manuscript for important intellectual content:** RHB,  
487 RCNM, CC, BL.

488

489

490 **Funding /Support:**

491 This study was supported by grants from Fundação de Amparo a Pesquisa do  
492 Estado do Rio de Janeiro (FAPERJ, Brazil, Proc. n.º 201.779/2017 -  
493 PDS/2017), Conselho Nacional de Desenvolvimento Científico e Tecnológico  
494 (CNPq, Brazil -RCNM) and Fundação de Amparo a Pesquisa do Estado de

495 Minas Gerais (FAPEMIG, Brazil, CBB-APQ-03647-16 -RCNM). RHBarbosa was  
496 a recipient of a Brazilian FAPERJ senior postdoctoral fellowship.

497

## 498 **References**

- 499 1. Dick GWA. Zika Virus (I). Isolations and serological specificity. *Trans R*  
500 *Soc Trop Med Hyg.* 1952. doi:10.1016/0035-9203(52)90042-4
- 501 2. Zanoluca C, De Melo VCA, Mosimann ALP, Dos Santos GIV, dos Santos  
502 CND, Luz K. First report of autochthonous transmission of Zika virus in  
503 Brazil. *Mem Inst Oswaldo Cruz.* 2015. doi:10.1590/0074-02760150192
- 504 3. Cardoso CW, Paploski IAD, Kikuti M, et al. Outbreak of Exanthematous  
505 Illness associated with Zika, Chikungunya, and Dengue viruses, Salvador,  
506 Brazil. *Emerg Infect Dis.* 2015. doi:10.3201/eid2112.151167
- 507 4. Metsky HC, Matranga CB, Wohl S, et al. Zika virus evolution and spread  
508 in the Americas. *Nature.* 2017. doi:10.1038/nature22402
- 509 5. Faria NR, Quick J, Claro IM, et al. Establishment and cryptic transmission  
510 of Zika virus in Brazil and the Americas. *Nature.* 2017.  
511 doi:10.1038/nature22401
- 512 6. Massad E, Burattini MN, Khan K, Struchiner CJ, Coutinho FAB, Wilder-  
513 Smith A. On the origin and timing of Zika virus introduction in Brazil.  
514 *Epidemiol Infect.* 2017. doi:10.1017/S0950268817001200
- 515 7. Passos SRL, Borges dos Santos MA, Cerbino-Neto J, et al. Detection of  
516 Zika virus in April 2013 patient samples, Rio de Janeiro, Brazil. *Emerg*  
517 *Infect Dis.* 2017. doi:10.3201/eid2312.171375
- 518 8. WHO | Zika Strategic Response Plan. *WHO.* 2016.  
519 <https://www.who.int/emergencies/zika-virus/strategic-response-plan/en/>.  
520 Accessed December 27, 2018.
- 521 9. Brazilian Ministry of Health. Homepage.  
522 [http://www.combateaedes.saude.gov.br/en/images/sala-de-](http://www.combateaedes.saude.gov.br/en/images/sala-de-situacao/Microcefalia-Protocolo-de-vigilancia-e-resposta)  
523 [situacao/Microcefalia-Protocolo-de-vigilancia-e-resposta.](http://www.combateaedes.saude.gov.br/en/images/sala-de-situacao/Microcefalia-Protocolo-de-vigilancia-e-resposta) Accessed  
524 December 27, 2018.
- 525 10. Mlakar J, Korva M, Tul N, et al. Zika Virus Associated with Microcephaly.  
526 *N Engl J Med.* 2016. doi:10.1056/NEJMoa1600651
- 527 11. Krauer F, Riesen M, Reveiz L, et al. Zika Virus Infection as a Cause of  
528 Congenital Brain Abnormalities and Guillain–Barré Syndrome: Systematic  
529 Review. *PLoS Med.* 2017. doi:10.1371/journal.pmed.1002203

- 530 12. Driggers RW, Ho C-Y, Korhonen EM, et al. Zika Virus Infection With  
531 Prolonged Maternal Viremia and Fetal Brain Abnormalities. *Obstet Anesth*  
532 *Dig.* 2017. doi:10.1097/01.aoa.0000512046.09676.84
- 533 13. Oliveira Melo AS, Malinger G, Ximenes R, Szejnfeld PO, Alves Sampaio  
534 S, Bispo De Filippis AM. Zika virus intrauterine infection causes fetal brain  
535 abnormality and microcephaly: Tip of the iceberg? *Ultrasound Obstet*  
536 *Gynecol.* 2016. doi:10.1002/uog.15831
- 537 14. Ventura C V., Maia M, Bravo-Filho V, Góis AL, Belfort R. Zika virus in  
538 Brazil and macular atrophy in a child with microcephaly. *Lancet.* 2016.  
539 doi:10.1016/S0140-6736(16)00006-4
- 540 15. Ventura C V., Maia M, Ventura B V., et al. Ophthalmological findings in  
541 infants with microcephaly and presumable intra-uterus Zika virus  
542 infection. *Arq Bras Oftalmol.* 2016. doi:10.5935/0004-2749.20160002
- 543 16. Zin AA, Tsui I, Rossetto J, et al. Screening criteria for ophthalmic  
544 manifestations of congenital zika virus infection. *JAMA Pediatr.* 2017.  
545 doi:10.1001/jamapediatrics.2017.1474
- 546 17. De Paula Freitas B, De Oliveira Dias JR, Prazeres J, et al. Ocular findings  
547 in infants with microcephaly associated with presumed zika virus  
548 congenital infection in Salvador, Brazil. *JAMA Ophthalmol.* 2016.  
549 doi:10.1001/jamaophthalmol.2016.0267
- 550 18. Fernandez MP, Parra Saad E, Ospina Martinez M, et al. Ocular  
551 histopathologic features of congenital Zika syndrome. *JAMA Ophthalmol.*  
552 2017. doi:10.1001/jamaophthalmol.2017.3595
- 553 19. Ventura C V., Ventura LO. Ophthalmologic Manifestations Associated  
554 With Zika Virus Infection. *Pediatrics.* 2018. doi:10.1542/peds.2017-2038E
- 555 20. Ventura C V., Maia M, Dias N, Ventura LO, Belfort R. Zika: Neurological  
556 and ocular findings in infant without microcephaly. *Lancet.* 2016.  
557 doi:10.1016/S0140-6736(16)30776-0
- 558 21. Tzelikis PF de M, Fernandes LC. Coloboma ocular: alterações oculares e  
559 sistêmicas associadas. *Arq Bras Oftalmol.* 2004;67(1):147-152.  
560 doi:10.1590/S0004-27492004000100026
- 561 22. Lebov JF, Brown LM, MacDonald PDM, et al. Review: Evidence of  
562 Neurological Sequelae in Children With Acquired Zika Virus Infection.  
563 *Pediatr Neurol.* 2018. doi:10.1016/j.pediatrneurol.2018.03.001
- 564 23. Chimelli L, Moura Pone S, Avvad-Portari E, et al. Persistence of Zika  
565 Virus After Birth: Clinical, Virological, Neuroimaging, and  
566 Neuropathological Documentation in a 5-Month Infant With Congenital

- 567 Zika Syndrome. *J Neuropathol Exp Neurol.* 2018;77(3):193-198.  
568 doi:10.1093/jnen/nlx116
- 569 24. Rocha NS, Burini CHP, Lima LS de A, Gonçalves RC, Thomassian A,  
570 Kamegasawa A. Uso de citologia por impressão nas doenças oculares  
571 externas no homem, bovino e eqüino. *Rev Educ Contin CRMV-SP.* 1999.
- 572 25. Egbert PR, Lauber S, Maurice DM. A simple conjunctival biopsy. *Am J*  
573 *Ophthalmol.* 1977. doi:10.1016/0002-9394(77)90499-8
- 574 26. Tseng SCG. Staging of Conjunctival Squamous Metaplasia by Impression  
575 Cytology. *Ophthalmology.* 1985. doi:10.1016/S0161-6420(85)33967-2
- 576 27. Maskin SL, Bode DD. Electron Microscopy of Impression-acquired  
577 Conjunctival Epithelial Cells. *Ophthalmology.* 1986. doi:10.1016/S0161-  
578 6420(86)33538-3
- 579 28. Nelson JD, Wright JC. Conjunctival Goblet Cell Densities in Ocular  
580 Surface Disease. *Arch Ophthalmol.* 1984.  
581 doi:10.1001/archophth.1984.01040030851031
- 582 29. Paridaens ADA, McCartney ACE, Curling OM, Lyons CJ, Hungerford JL.  
583 Impression cytology of conjunctival melanosis and melanoma. *Br J*  
584 *Ophthalmol.* 1992. doi:10.1136/bjo.76.4.198
- 585 30. Nolan GR, Hirst LW, Wright RG, Bancroft BJ. Application of impression  
586 cytology to the diagnosis of conjunctival neoplasms. *Diagn Cytopathol.*  
587 1994. doi:10.1002/dc.2840110310
- 588 31. Dart J. Impression cytology of the ocular surface - Research tool or  
589 routine clinical investigation? *Br J Ophthalmol.* 1997.  
590 doi:10.1136/bjo.81.11.930
- 591 32. Boja ES, Kinsinger CR, Rodriguez H, Srinivas P. Integration of omics  
592 sciences to advance biology and medicine. In: *Clinical Proteomics.* ;  
593 2014. doi:10.1186/1559-0275-11-45
- 594 33. Lleras-Forero L, Streit A. Development of the sensory nervous system in  
595 the vertebrate head: The importance of being on time. *Curr Opin Genet*  
596 *Dev.* 2012. doi:10.1016/j.gde.2012.05.003
- 597 34. van den Pol AN, Mao G, Yang Y, Ornaghi S, Davis JN. Zika Virus  
598 Targeting in the Developing Brain. *J Neurosci.* 2017.  
599 doi:10.1523/JNEUROSCI.3124-16.2017
- 600 35. Tang H, Hammack C, Ogden SC, et al. Zika virus infects human cortical  
601 neural progenitors and attenuates their growth. *Cell Stem Cell.* 2016.  
602 doi:10.1016/j.stem.2016.02.016

- 603 36. Cugola FR, Fernandes IR, Russo FB, et al. The Brazilian Zika virus strain  
604 causes birth defects in experimental models. *Nature*. 2016.  
605 doi:10.1038/nature18296
- 606 37. de Noronha L, Zanluca C, Azevedo MLV, Luz KG, dos Santos CND. Zika  
607 virus damages the human placental barrier and presents marked fetal  
608 neurotropism. *Mem Inst Oswaldo Cruz*. 2016. doi:10.1590/0074-  
609 02760160085
- 610 38. Monnerat LS, Moreira A dos S, Alves MCV, Bonvicino CR, Vargas FR.  
611 Identification and characterization of novel sequence variations in MECP2  
612 gene in Rett syndrome patients. *Brain Dev*. 2010.  
613 doi:10.1016/j.braindev.2009.11.007
- 614 39. Expert Single Cell Sequencing Services - SingulOmics.  
615 <http://singulomics.com/>. Accessed December 29, 2018.
- 616 40. Genome Sequencing Company | Novogene. <https://en.novogene.com/>.  
617 Accessed December 29, 2018.
- 618 41. Genomics Agilent | Agilent.  
619 <https://www.agilent.com/en/products/genomics-agilent>. Accessed  
620 December 29, 2018.
- 621 42. Hughes AP, Shaw NJ, Southall P, et al. Conjunctival impression cytology  
622 in the preterm infant and it's relation to outcome. *Eur J Pediatr*. 1997.  
623 doi:10.1007/s004310050642
- 624 43. Kjolhede CL, Gadomski AM, Wittpenn J, et al. Conjunctival impression  
625 cytology: Feasibility of a field trial to detect subclinical vitamin A  
626 deficiency. *Am J Clin Nutr*. 1989. doi:10.1093/ajcn/49.3.490
- 627 44. Natadisastra G, Wittpenn JR, Muhilal, West KP, Mele L, Sommer A.  
628 Impression cytology: a practical index of vitamin A status. *Am J Clin Nutr*.  
629 1988.
- 630 45. Bruno de Paula Freitas CVVMMRB. Zika virus and the eye. *Curr Opin*  
631 *Ophthalmol*. 2017;28(6):595-599. doi:10.1097/icu.0000000000000420
- 632 46. Bandyopadhyay D, Qureshi A, Ashish K, Hajra A, Chakraborty S. Effect of  
633 ZIKA virus on adult eyes. *Eur J Intern Med*. 2018.  
634 doi:10.1016/j.ejim.2017.06.016
- 635 47. Gokuladhas K, Sivapriya N, Barath M, NewComer CH. Ocular progenitor  
636 cells and current applications in regenerative medicines – Review. *Genes*  
637 *Dis*. 2017. doi:10.1016/j.gendis.2017.01.002
- 638 48. Miner JJ, Sene A, Richner JM, et al. Zika Virus Infection in Mice Causes  
639 Panuveitis with Shedding of Virus in Tears. *Cell Rep*. 2016.



- 640 doi:10.1016/j.celrep.2016.08.079
- 641 49. Swaminathan S, Schlaberg R, Lewis J, Hanson KE, Couturier MR. Fatal  
642 Zika Virus Infection with Secondary Nonsexual Transmission. *N Engl J*  
643 *Med.* 2016. doi:10.1056/NEJMc1610613
- 644 50. Tan J JL, Balne PK, Leo YS, Tong L, Ng LFP, Agrawal R. Persistence of  
645 Zika virus in conjunctival fluid of convalescence patients. *Sci Rep.* 2017.  
646 doi:10.1038/s41598-017-09479-5
- 647 51. OMIM - Online Mendelian Inheritance in Man. <http://www.omim.org/>.  
648 Accessed December 29, 2018.
- 649 52. Dahan O, Gingold H, Pilpel Y. Regulatory mechanisms and networks  
650 couple the different phases of gene expression. *Trends Genet.* 2011.  
651 doi:10.1016/j.tig.2011.05.008
- 652 53. Morris AR, Mukherjee N, Keene JD. Systematic analysis of  
653 posttranscriptional gene expression. *Wiley Interdiscip Rev Syst Biol Med.*  
654 2010. doi:10.1002/wsbm.54
- 655 54. Gipson IK. Goblet cells of the conjunctiva: A review of recent findings.  
656 *Prog Retin Eye Res.* 2016. doi:10.1016/j.preteyeres.2016.04.005
- 657 55. Singh S, Oli C, Mishra V, et al. Cytomorphology of Conjunctival  
658 Epithelium in Ocular Surface Disorders. *Int J Ophthalmic Pathol.*  
659 2017;06(01). doi:10.4172/2324-8599.1000195.

660

## 661 **Figure legends**

662 **Figure 1.** Overview of the non-invasive strategy (impression cytology method)  
663 used to collect ocular cells from children with Congenital Zika Syndrome and  
664 applied methodologies. **A.** Impression cytology was optimized (without use of  
665 tweezers and pediatric lid speculum) for sample collection. The membrane  
666 model has a rounded apex and a long support base that provides a correct  
667 positioning and safer method for the collection of baby ocular samples. **B.**  
668 Methodologies applied to different studies of captured cells.

669 **Figure 2.** Nitrocellulose membrane fibers impregnated by ocular surface cells  
670 from CZS patient (A, B1, B2) and uninfected controls (B3 and B4). **A.**  
671 Representative live cells are shown by phase contrast (A1) and fluorescence  
672 microscopy (A2). An overlay of these two images is seen in (A3). Viable cells  
673 fluoresce in bright green after staining with LIVE/DEAD<sup>®</sup> cell viability/cytotoxicity  
674 assay. Cells were imaged 5h after collection. **B.** Representative membranes

675 directly stained with hematoxylin/eosin. Membrane-attached cells are indicated  
676 by arrowheads in higher magnification in (B2) and (B3). Scale bars, 20  $\mu\text{m}$  (A1-  
677 A3); 70  $\mu\text{m}$  (B1); 35  $\mu\text{m}$  (B2); 50  $\mu\text{m}$  (B3); 25  $\mu\text{m}$  (B4).

678

679 **Figure 3. Morphological analyses A.** Different ocular surface cells collected  
680 from impression cytology. **A1.** Human conjunctiva cell types pattern.  
681 Representative basal, polyhedral and goblets cells from uninfected (A2-A4, A6)  
682 and ZIKV-infected children with no clinical signs (A5, A7) show normal  
683 morphology. **B.** Morphological changes observed in cells from ZIKV infected  
684 children without clinical signs (B1, B2) and CZS children (B3-B8). Cell changes  
685 included mild to moderate keratinization (B1-B4), piknosis (B4 and B5),  
686 karyolysis (B2 and B3), anucleation (B6) and vacuolization (Figure B7 and B8).  
687 Cytocentrifuged preparations were stained with Diff-Quik (A2, A4, A6, B1-B4) or  
688 toluidine blue (A3, A5, A7, B5-B8). Scale bars, 5  $\mu\text{m}$  (A6, A7); 10  $\mu\text{m}$  (A2, B2-  
689 B5); 20  $\mu\text{m}$  (A3-A5, B1, B7); 25  $\mu\text{m}$  (B6).

690

691 **Figure 4. Molecular and “OMIC” research perspectives. A.** Electrophoresis  
692 in 1.5% agarose gel and the amplification of a 350bp fragment correspondent to  
693 amplicon 4 of the *MCPE2* gene in DNA of the ocular surface cells. **B\*.** Quality  
694 and integrity RNA analysis. L= ladder, 1 and 2= CZS children. **C\*.** Quality  
695 control libraries - comparative concentrations for positive control (of the used  
696 method) and healthy child (control sample of this study). \*Provided by  
697 Singulomics®.

698

699 **Figure 5. Ocular surface cells gene expression analyses by RNA-Seq. A.**  
700 Descriptive analysis table. **B.** Transcripts quantified and regulated. Venn  
701 diagram of DRG ( $p < 0.001$ ).

702 **Supplementary Figure 1.** Representative viable and non-viable cells  
703 recovered from the conjunctiva of children using an impression cytology  
704 method. Live cells fluoresce green whereas dead cells with compromised  
705 membranes fluoresce red-orange after staining with LIVE/DEAD® cell  
706 viability/cytotoxicity assay. (A, D, G) are from uninfected patients; (B, E, H) are  
707 from CZV patients (positive PCR during gestation) with no clinical signs; (C, F,

708 I) are from CZV children (positive PCR) with diagnosed clinical signs (ocular  
709 abnormalities and microcephaly). Scale bars, 10  $\mu\text{m}$  (A, D, G); 20  $\mu\text{m}$  (B, H, C);  
710 20  $\mu\text{m}$  (C, F, I). Cells were imaged 5h after collection.

711

712 **Table legends.**

713 **Table 1.** Clinical data.

714 **Table 2.** Number of of identified proteins by mass spectrometry-based  
715 proteomics analysis.

**A**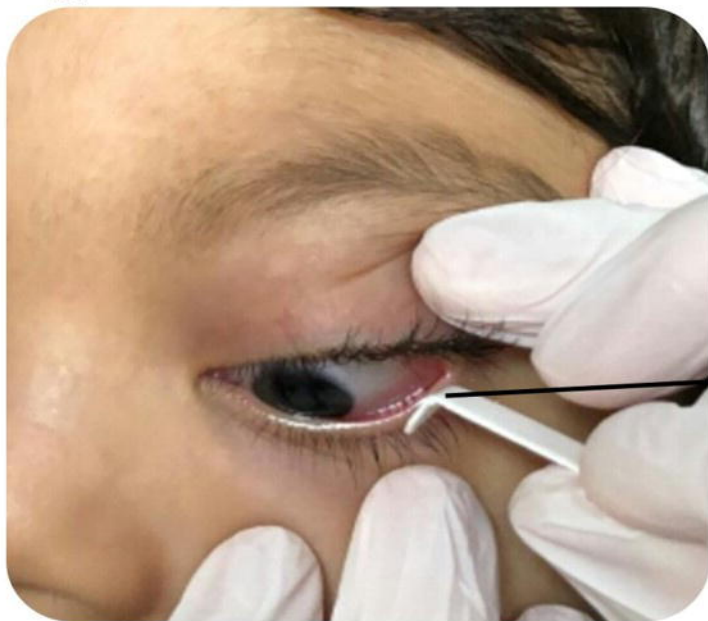**Nitrocellulose membrane**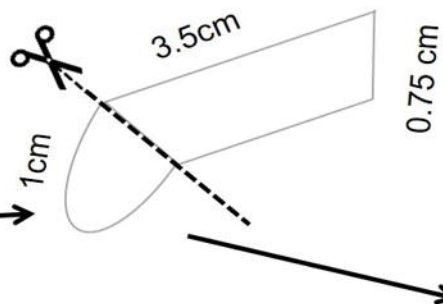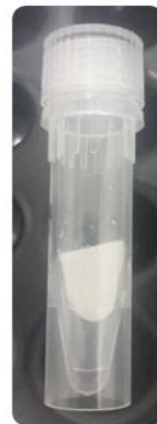**2mL Microtube containing PBS****B**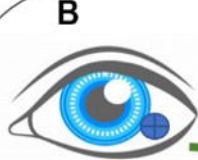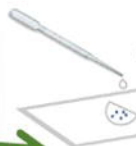**Membrane Staining (H&E)****Citospin preparation****Cell Staining  
(Diff-Quik and Toluidine blue)****MICROSCOPICAL ANALYSIS**

- ✓ Cell morphology
- ✓ Cell viability: Trypan blue staining and Live/Dead imaging

**MOLECULAR RESEARCH**

- ✓ PCR
- ✓ cDNA synthesis and amplification
- ✓ Libraries preparation

**DNA and RNA isolation****OMIC STUDIES**

- ✓ Transcriptomic
- ✓ Proteomic

**Single-Cell RNA sequencing**

250µL

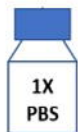**(( Fast Vortex ))****Obtention of  
cells suspension**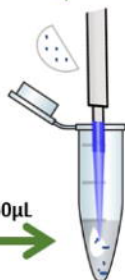

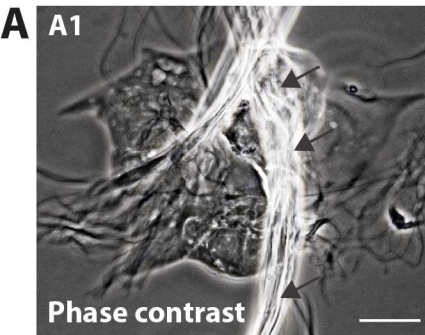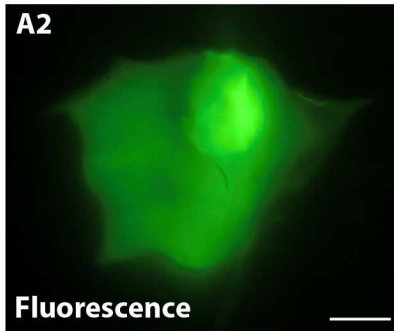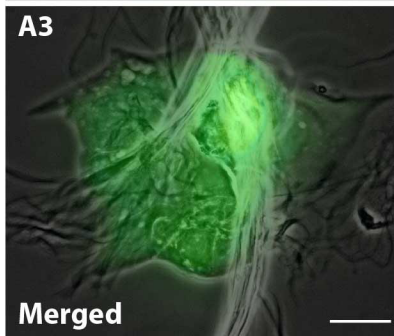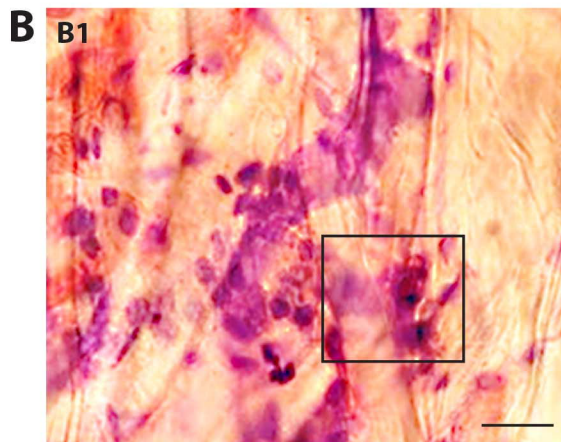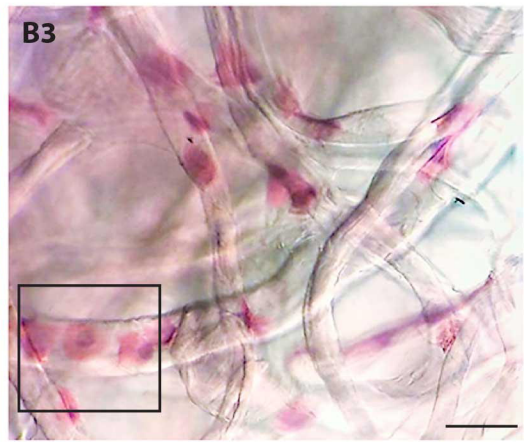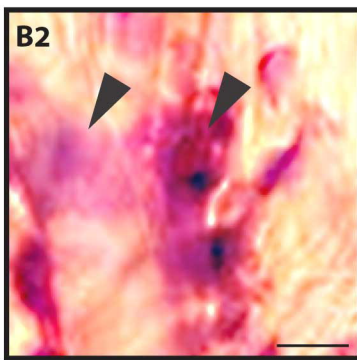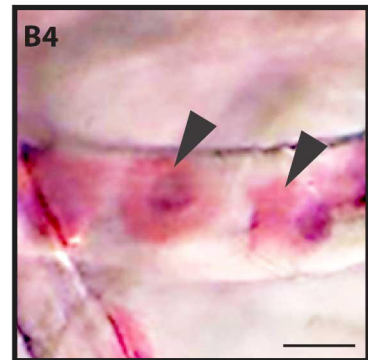

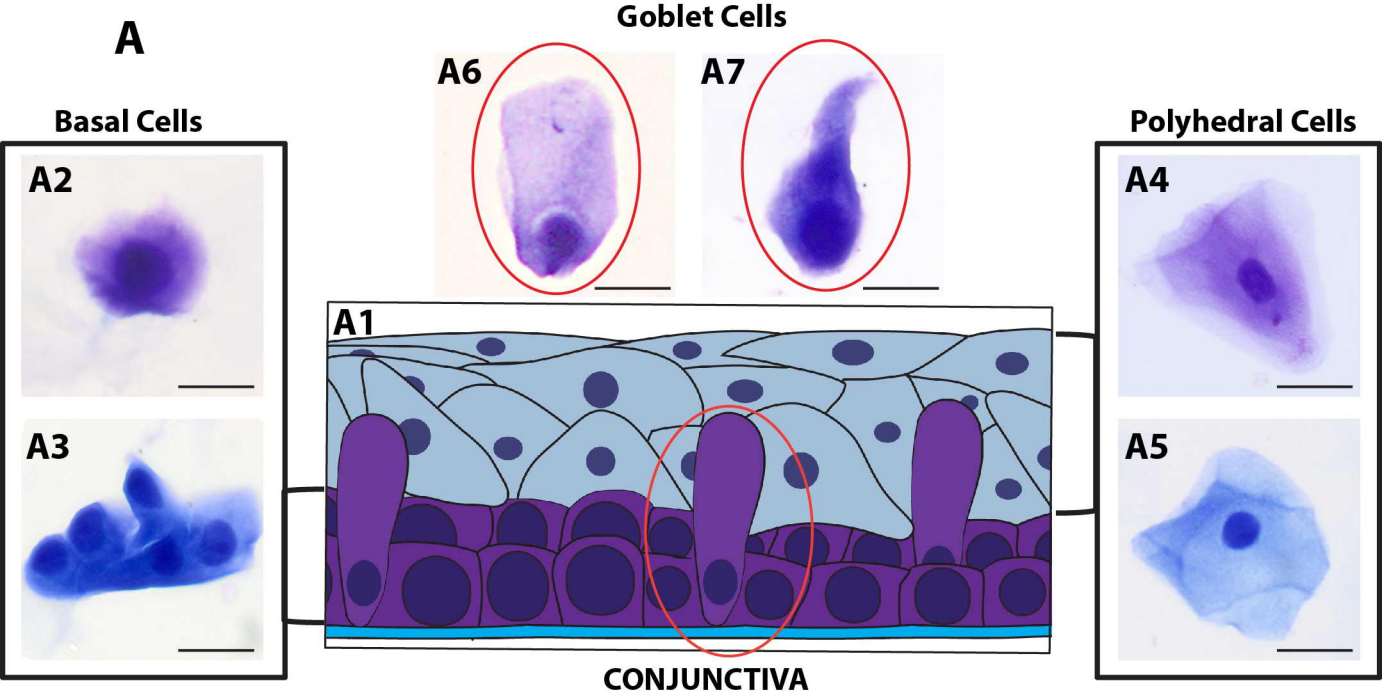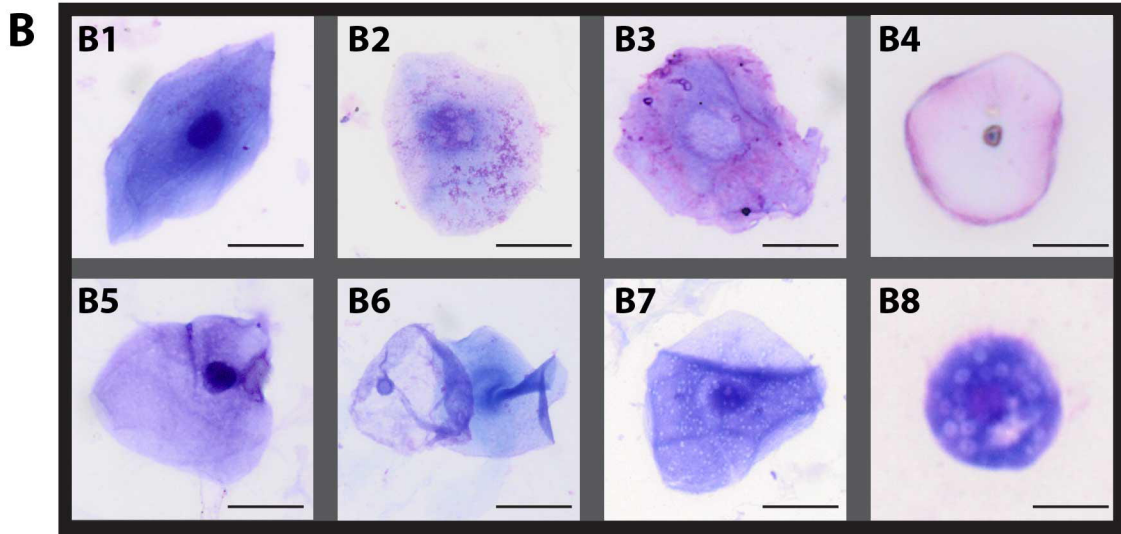

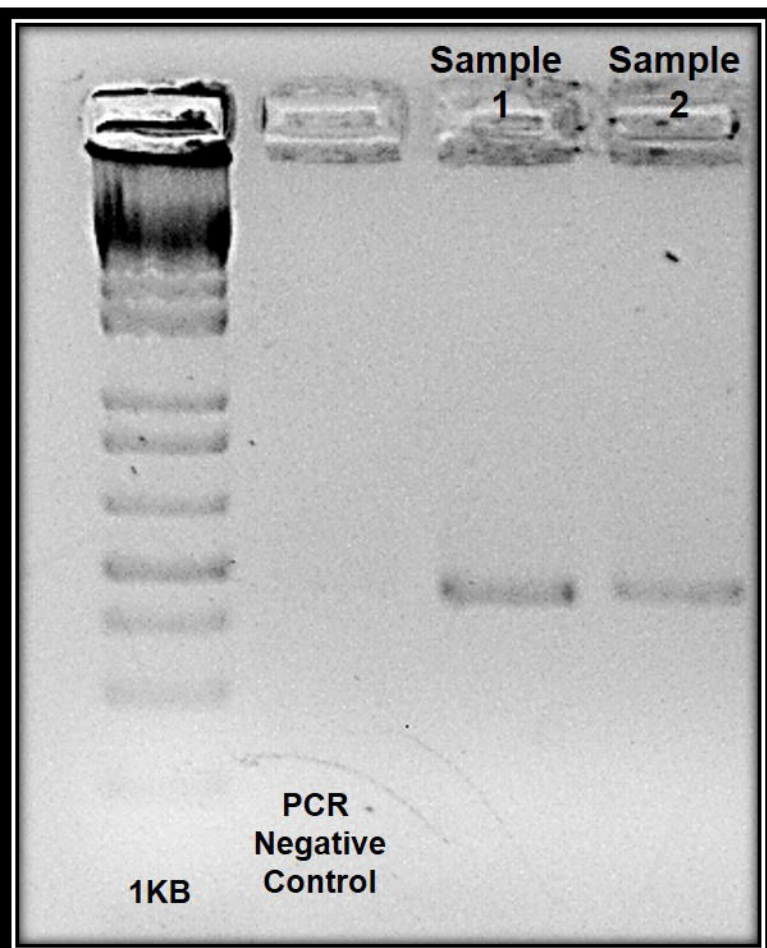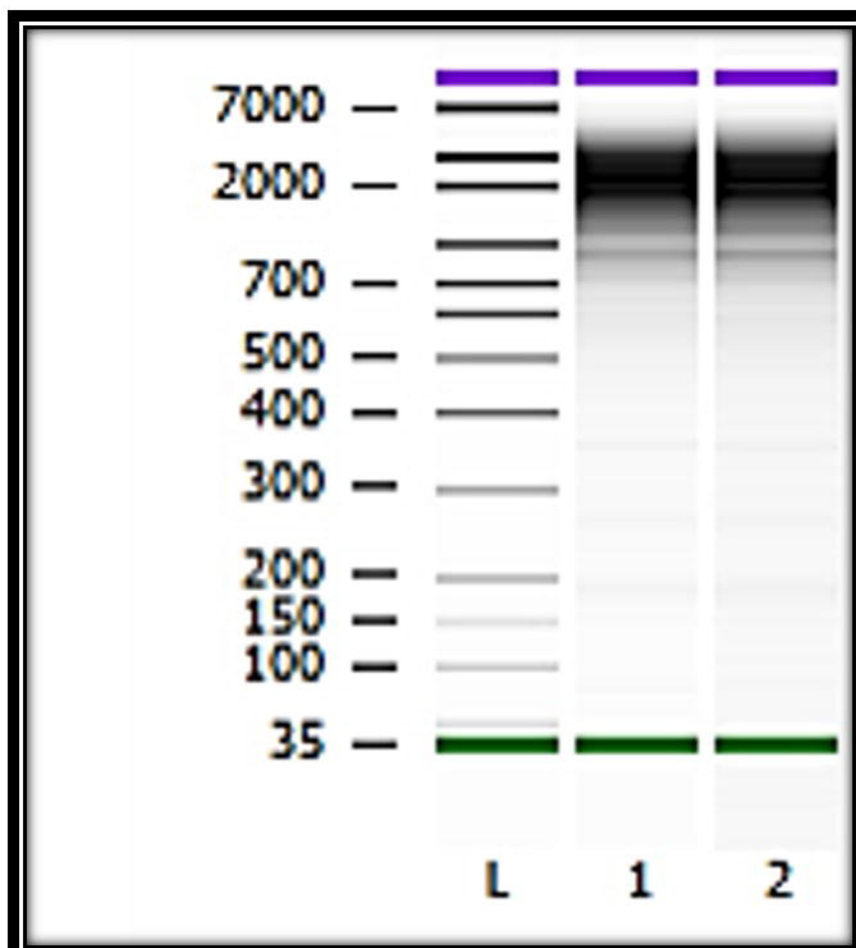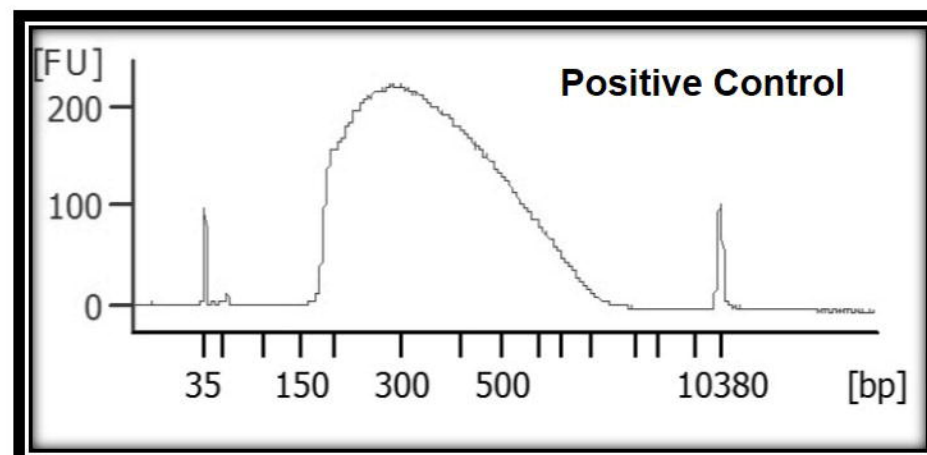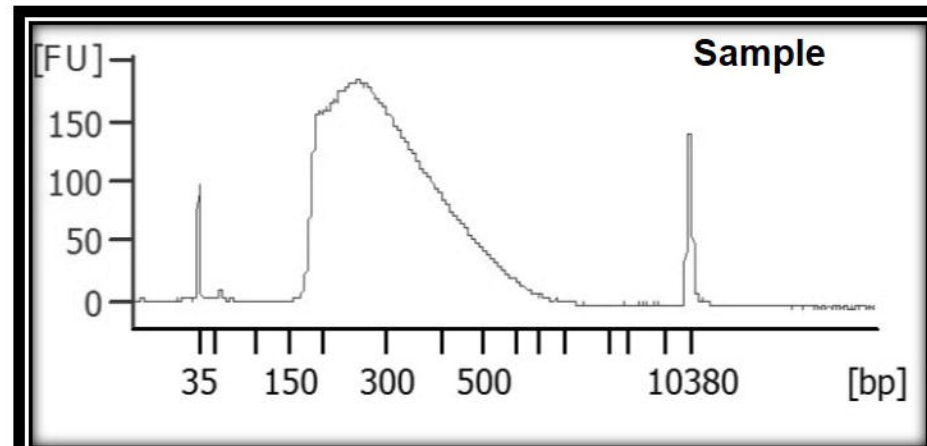

**A**

|                                                | Transcripts |
|------------------------------------------------|-------------|
| Quantified in all samples<br>(5 reads or more) | 8582        |
| ZIKV/CZS vs CTRL<br>( $p < 0.001$ )            | 38          |
| ZIKV/CZS vs CTRL<br>( $q < 0.01$ )             | 18          |
| ZIKV vs CTRL<br>( $p < 0.001$ )                | 29          |
| ZIKV vs CTRL<br>( $q < 0.01$ )                 | 9           |

**B**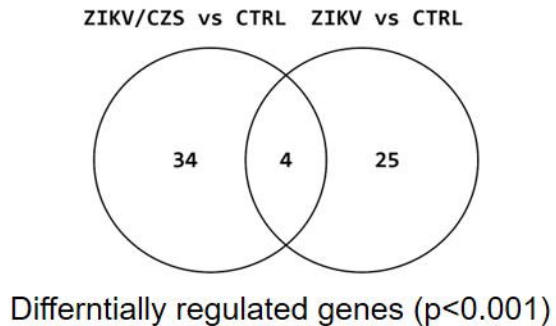



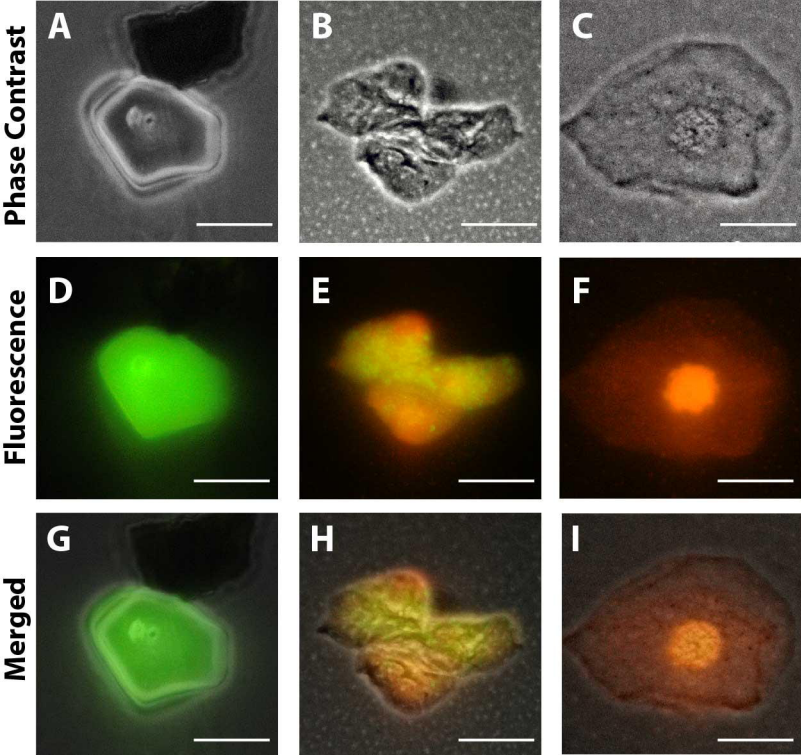

| <b>Subject's ID</b> | <b>Gender</b> | <b>Status (ZIKV exposition during pregnancy)</b> | <b>Status (for microcephaly)</b> | <b>Vision impairment</b> | <b>Age at samples collection (in months)</b> | <b>ZIKV infection symptoms and PCR</b> |
|---------------------|---------------|--------------------------------------------------|----------------------------------|--------------------------|----------------------------------------------|----------------------------------------|
| #1                  | M             | Exposed                                          | Affected                         | Yes                      | 21                                           | 1 <sup>o</sup> trimester               |
| #2                  | M             | Exposed                                          | Affected                         | Yes                      | 22                                           | 1 <sup>o</sup> trimester               |
| #3                  | M             | Exposed                                          | Affected                         | Yes                      | 19                                           | 2 <sup>o</sup> trimester               |
| #4                  | F             | Exposed                                          | Affected                         | Yes                      | 27                                           | 1 <sup>o</sup> trimester               |
| #5                  | M             | Exposed                                          | Non-affected                     | No                       | 21                                           | 2 <sup>o</sup> trimester               |
| #6                  | M             | Exposed                                          | Non-affected                     | No                       | 20                                           | 2 <sup>o</sup> trimester               |
| #7                  | F             | Exposed                                          | Non-affected                     | No                       | 24                                           | 3 <sup>o</sup> trimester               |
| #8                  | F             | Exposed                                          | Non-affected                     | No                       | 24                                           | 3 <sup>o</sup> trimester               |
| #9                  | M             | Non-exposed                                      | Non-affected                     | No                       | 9                                            | -                                      |
| #10                 | F             | Non-exposed                                      | Non-affected                     | No                       | 21                                           | -                                      |
| #11                 | M             | Non-exposed                                      | Non-affected                     | No                       | 24                                           | -                                      |
| #12                 | M             | Non-exposed                                      | Non-affected                     | No                       | 19                                           | -                                      |

| <b>Condition</b>                           | <b>N° of identified proteins</b> |
|--------------------------------------------|----------------------------------|
| <b>CTRL</b>                                | 2080                             |
| <b>ZIKV</b>                                | 2085                             |
| <b>ZIKV/CZS</b>                            | 2086                             |
| <b>Common between the three conditions</b> | 2062                             |
